# Supplementary material
Source: PubMed Central journal article supplement (PMC3475186)
Supplement: NIHMS407706-supplement-01.pdf [file NIHMS407706-supplement-01.pdf]

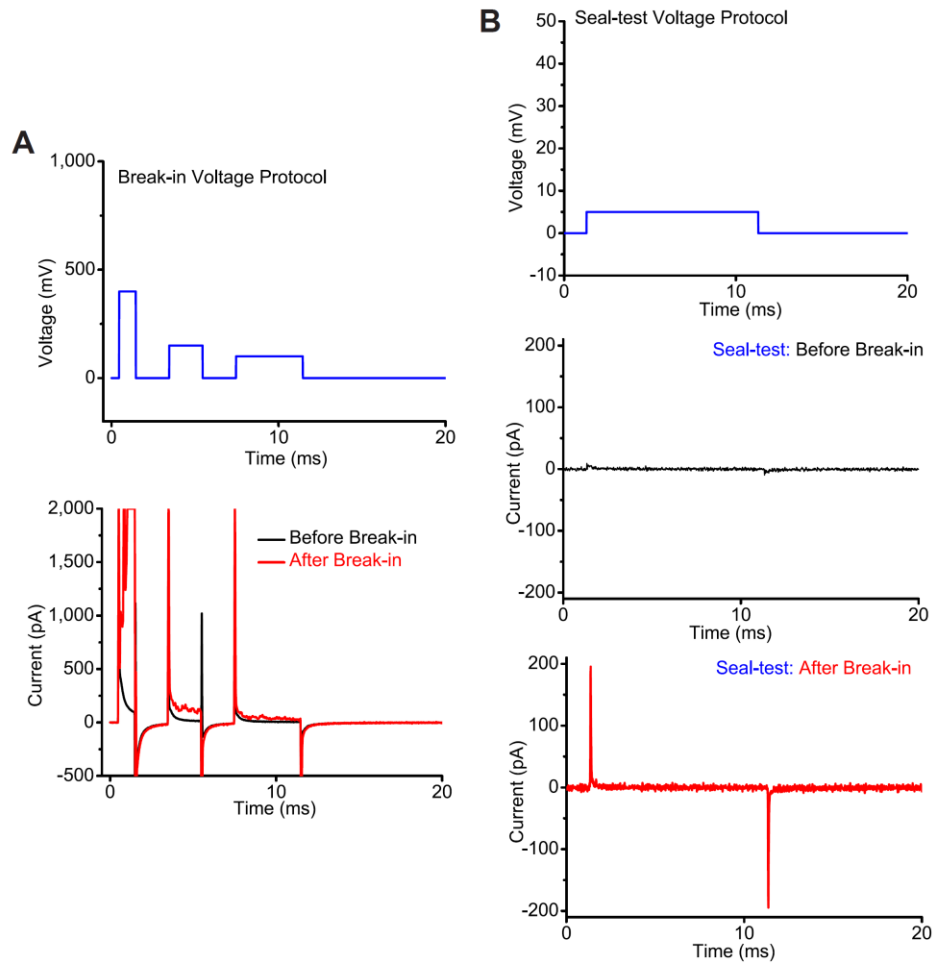

**Figure S1. Experimental protocols for the whole-endolysosome patch-clamp technique--Related to Figure 1.**

**(A).** Membrane test (the lower panel) before (black) and after (red) break-in using a voltage protocol (upper panel).

**(B).** Membrane test before (middle panel, black) and after (lower panel, red) break-in using a seal-test voltage protocol (upper panel).

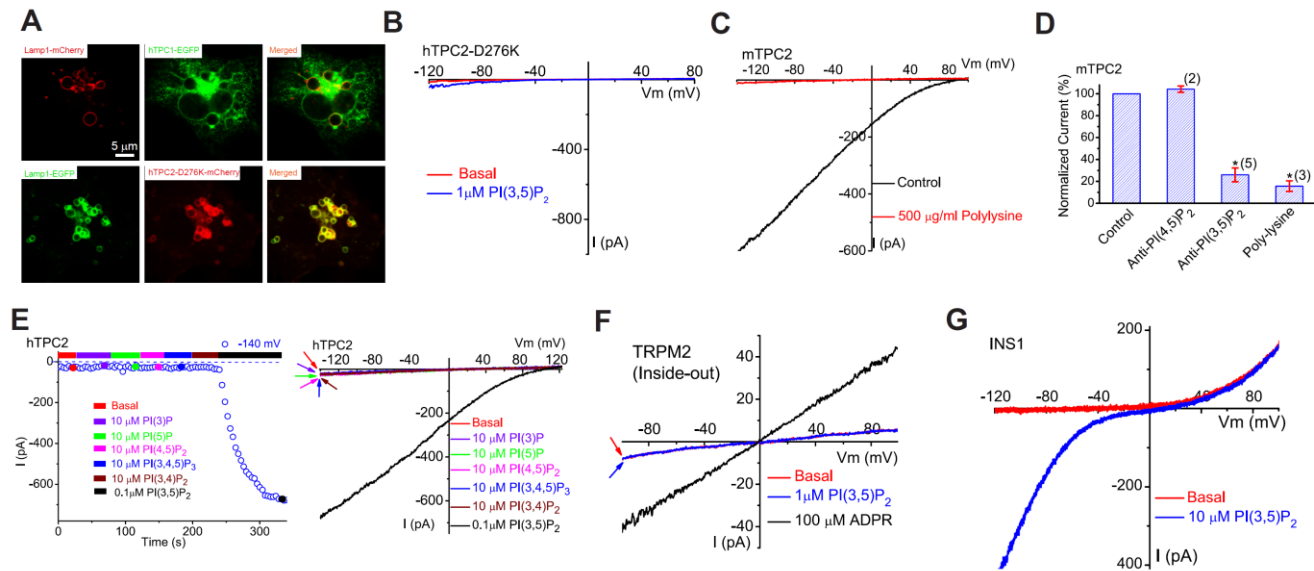

**Figure S2. PI(3,5) $P_2$  activates recombinant TPCs in endolysosomes--Related to Figure 2.**

**(A).** Human TPC1 and TPC2 pore-mutant proteins were localized in endosomes and lysosomes. COS-1 cells were transfected with TPC and Lamp-1 fusion proteins and treated with vacuolin-1.

**(B).** A mutation of a negatively-charged amino acid residue in the first putative pore region of TPC2 abolishes  $I_{hTPC2}$ . PI(3,5) $P_2$  (1  $\mu\text{M}$ ) activated a small TRPML-like current, but not  $I_{hTPC2}$ , in an enlarged endolysosome/vacuole isolated from an *hTPC2-D276K*-transfected COS-1 cell.

**(C).** PI(3,5) $P_2$ -activated  $I_{mTPC2}$  was inhibited by bath (cytoplasmic) application of poly-L-lysine (500  $\mu\text{g/ml}$ ) to an enlarged endolysosome isolated from an mTPC2-EGFP-expressing COS-1 cell.

**(D).**  $I_{mTPC2}$  (post PI(3,5) $P_2$  application) was inhibited 80- 90% by bath application of poly-L-lysine (500  $\mu\text{g/ml}$ ) or anti-PI(3,5) $P_2$  antibody (5  $\mu\text{g/ml}$ ). The inhibition was irreversible (within several minutes), but  $I_{mTPC2}$  could be re-activated by PI(3,5) $P_2$  upon washout of poly-L-lysine or anti-PI(3,5) $P_2$  antibody.

**(E).** Specific activation of hTPC2 by PI(3,5) $P_2$  (in 0.1  $\mu\text{M}$ ), but not other diC8 PIPs (all in 10  $\mu\text{M}$ ). The right panel shows representative traces of  $I_{hTPC2}$  with different PIPs applied at different time points, as shown in the left panel.

**(F).** Bath application of ADPR (100  $\mu\text{M}$ ), but not PI(3,5) $P_2$  (1  $\mu\text{M}$ ), activated a current with a linear I-V in an inside-out patch excised from a TRPM2-transfected HEK293T cell.

**(G).** PI(3,5) $P_2$  (10  $\mu\text{M}$ ) selectively activated the inward, but not the outward current, in an endolysosome isolated from an INS1 pancreatic  $\beta$ -cell.

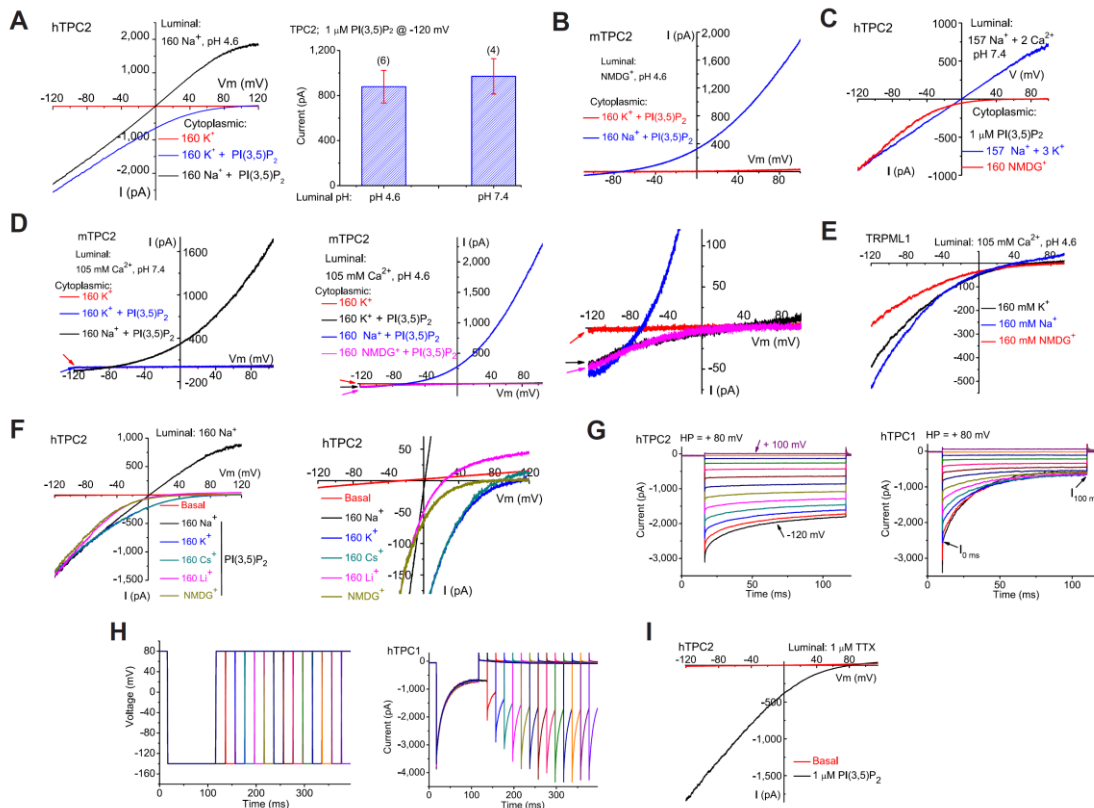

**Figure S3. Whole-endolysosome  $I_{hTPC2}$  is selective for  $Na^+$ --Related to Figure 3.**

**(A).**  $I_{TPC2}$  is selective for  $Na^+$  over  $K^+$  at both acidic and neutral luminal pH. Left panel: large outward  $I_{hTPC2}$  was seen with cytoplasmic  $Na^+$ , but not  $K^+$ , in the presence of luminal  $Na^+$  at low pH (pH 4.6); Right panel: the current amplitudes of PI(3,5)P<sub>2</sub>-activated  $I_{TPC2}$  were similar at neutral and acidic luminal pH.

**(B).**  $I_{mTPC2}$  is impermeant to NMDG<sup>+</sup> or H<sup>+</sup>;  $I_{mTPC2}$  exhibited no significant inward current in the presence of luminal NMDG<sup>+</sup> (150 mM; pH4.6), and cytoplasmic  $K^+$  (160 mM) or  $Na^+$  (160 mM).

**(C).** Little or no effect of luminal  $Ca^{2+}$  on the inward current and  $E_{rev}$  of  $I_{hTPC2}$ .

**(D).**  $I_{mTPC2}$  is selective for  $Na^+$  over  $Ca^{2+}$  at acidic and neutral luminal pH. Left panel: in luminal isotonic  $Ca^{2+}$  (105 mM; pH 7.4) and cytoplasmic  $Na^+$ ,  $E_{rev}$  for  $I_{hTPC2}$  was  $< -60mV$ . Middle and right (an expanded view) panels: low  $I_{mTPC2}$  permeability to luminal  $Ca^{2+}$  under bi-ionic conditions (luminal isotonic  $Ca^{2+}$  versus cytoplasmic  $Na^+$ ), the  $E_{rev}$  of  $I_{TPC2}$  was  $-68 \pm 2mV$  ( $n = 12$ ).

**(E).**  $I_{TRPML1}$  is highly  $Ca^{2+}$ -permeable;  $I_{TRPML1}$  with luminal isotonic  $Ca^{2+}$  and cytoplasmic  $Na^+$  or  $K^+$  exhibited a positive  $E_{rev}$  ( $+ 47 \pm 2mV$ ,  $n = 3$ ).

**(F).**  $I_{hTPC2}$  is selectively permeable to  $Na^+$ , and to a lesser degree  $Li^+$ , but not  $K^+$  or  $Cs^+$ ;  $I_{hTPC2}$  was recorded in the presence of cytoplasmic monovalent cations and luminal  $Na^+$ . Right panel shows an expanded view of  $E_{rev}$  in the presence of different cytoplasmic monovalent cations.

**(G).**  $I_{hTPC2}$  and  $I_{hTPC1}$  elicited by a voltage-step protocol. HP = + 80 mV.

**(H).** Time-dependent recovery of  $I_{TPC1}$  from inactivation at negative voltages. Removal of voltage-dependent inactivation (at -140 mV) by a short pre-pulse to positive membrane potential (+ 80 mV). Right panel shows the voltage protocol used to study the time-dependent recovery of  $I_{hTPC1}$  from inactivation.

**(I).** Insensitivity of  $I_{hTPC2}$  to TTX (included in the luminal/pipette solution; pH 7.4).

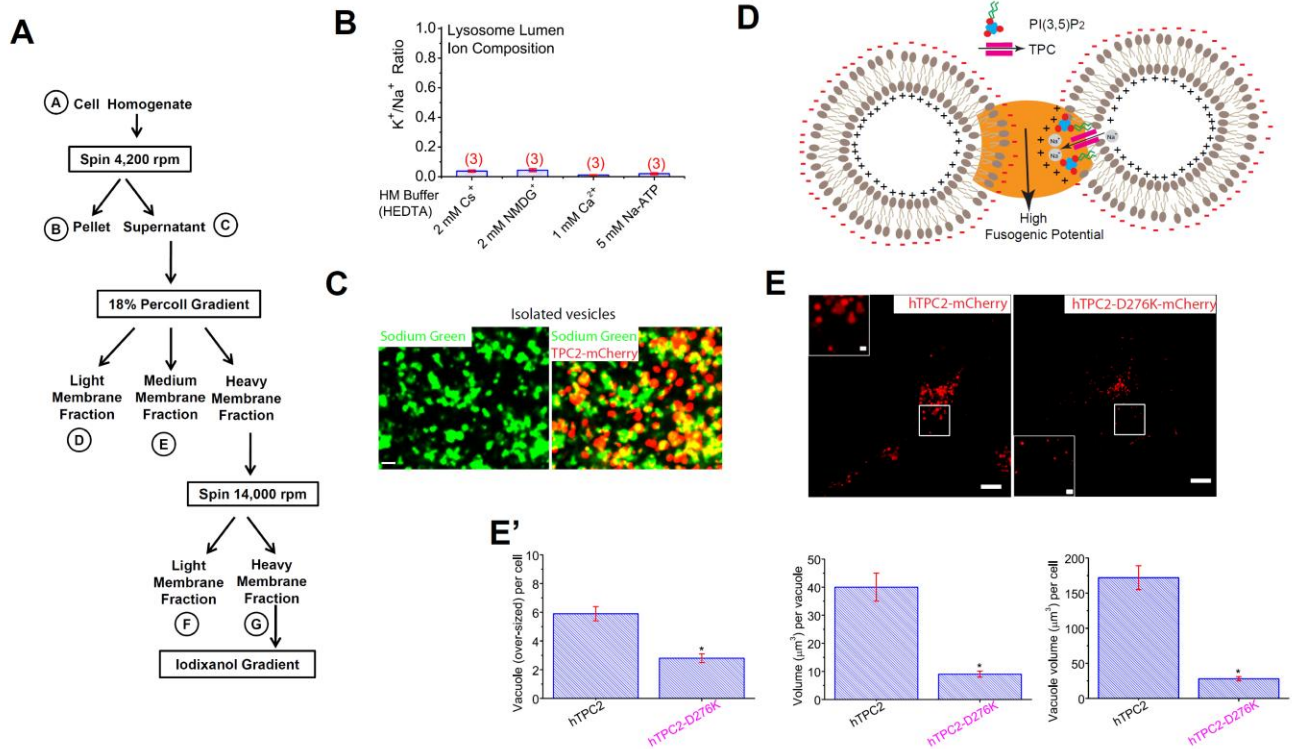

**Figure S4. Ionic composition in the lysosomes of HEK293T cells isolated by cellular fractionation--Related to Figure 4.**

**(A).** Centrifugation of cell homogenate (fraction A) of HEK293T cells resulted in a pellet (fraction B) and a supernatant (fraction C). The supernatant was then layered over a discontinued gradient containing a cushion of 2.5 M sucrose and 18% Percoll in the HM buffer. Further centrifugation of the gradient resulted in the light membrane fraction (fraction D), the medium membrane fraction (fraction E), and the heavy membrane fraction (fraction G).

**(B).** Luminal  $K^+/Na^+$  ratios under various homogenizing buffer conditions.

**(C).** TPC2-mCherry-positive isolated vesicles/lysosomes were loaded with Sodium Green dye. Scale bar = 2  $\mu m$ .

**(D).** An electrostatic model for the potential role of TPC-mediated  $Na^+$  flux in endolysosomal dynamics. Endolysosomes have a luminal-side positive transmembrane potential at rest (estimated to be + 30 to + 110 mV; see ref. (Dong et al., 2010)). Charge repulsion may prevent docking and fusion of alike endolysosomes. Upon PIKfyve recruitment/activation, rapid and localized generation of PI(3,5)P<sub>2</sub> triggers TPC-mediated  $Na^+$  efflux and subsequent depolarization of the endolysosomal membrane toward  $E_{Na^+}$ . This rapid and localized reversal of charge may permit the fusion of the PI(3,5)P<sub>2</sub>-enriched microdomain.

**(E).** Vacuole size measurement in COS1 cells transfected with either hTPC2-mCherry or hTPC2-D276K-mCherry constructs. Images were taken using an Olympus Spinning-Disk confocal with 0.2  $\mu m$  Z-steps. Vacuole size was measured using the 4D viewer and object measurement functions of Metamorph (Olympus) software. Scale bar = 10  $\mu m$  (2  $\mu m$  for the inset). **(E').** Over-sized vacuoles (radius > 1  $\mu m$ ) were analyzed for number of vacuoles per cell, volume per vacuole, and total vacuole volume/cell. For each group, cells (n =49) were randomly selected from 3 independent transfections.

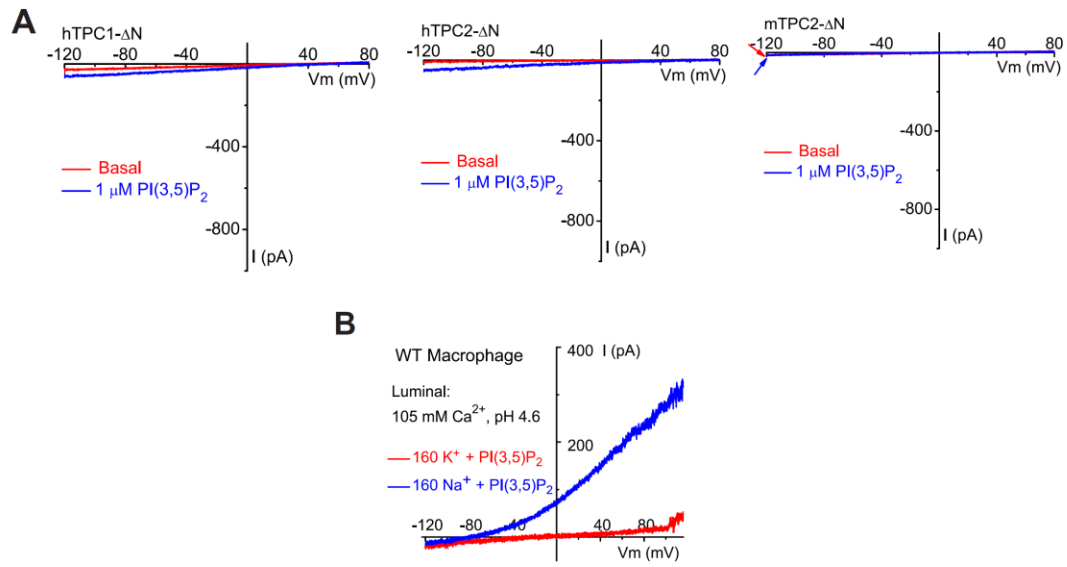

**Figure S5. N-terminal truncations of TPC1 and TPC2 abolish TPC currents in the endolysosome--Related to Figure 5.**

**(A).** N terminal truncations in hTPC1, hTPC2, and mTPC2 abolished  $I_{TPC}$ . PI(3,5)P<sub>2</sub> (1 μM) activated small currents in enlarged vacuoles isolated from hTPC1-ΔN (the left panel), hTPC2-ΔN (the middle panel), or mTPC2-ΔN (the right panel) -transfected COS-1 cells.

**(B).** PI(3,5)P<sub>2</sub>-activated whole-endolysosome currents in macrophages are Na<sup>+</sup> selective over Ca<sup>2+</sup>.  $E_{rev}$  was negative for an endogenous whole-endolysosome PI(3,5)P<sub>2</sub>-activated current of a macrophage in the presence of luminal isotonic Ca<sup>2+</sup> and cytoplasmic Na<sup>+</sup>.

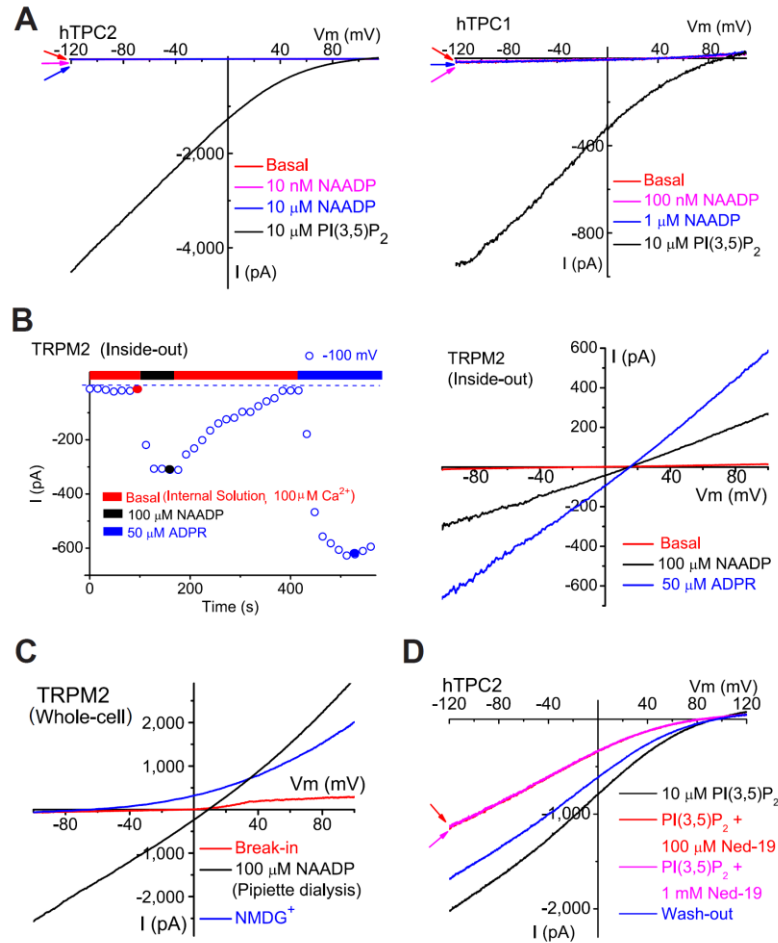

**Figure S6. NAADP activates TRPM2, but not TPC1 or TPC2--Related to Figure 6.**

**(A).** NAADP (10 nM or 10  $\mu$ M) failed to activate whole-endolysosome  $I_{hTPC2}$ . In contrast, PI(3,5)P<sub>2</sub> robustly activated  $I_{hTPC2}$  in the same vacuole. Likewise, NAADP (100 nM or 1  $\mu$ M) failed to activate whole-endolysosome  $I_{hTPC1}$ . In contrast, PI(3,5)P<sub>2</sub> robustly activated  $I_{hTPC1}$  in the same vacuole.

**(B).** NAADP (100  $\mu$ M) or ADPR (50  $\mu$ M) activated a current with a linear I-V in an inside-out patch excised from a TRPM2-transfected HEK293T cell.

**(C).** Activation of whole-cell  $I_{TRPM2}$  by pipette dialysis of NAADP. Inclusion of NAADP (100  $\mu$ M) into the pipette solution under the whole-cell configuration induced  $I_{TRPM2}$  in a TRPM2-transfected HEK293T cell.

**(D).**  $I_{hTPC2}$  was relatively insensitive to Ned-19, a blocker of the endogenous NAADP receptor; PI(3,5)P<sub>2</sub>-activated  $I_{hTPC2}$  was weakly inhibited by Ned-19 (100  $\mu$ M or 1 mM).

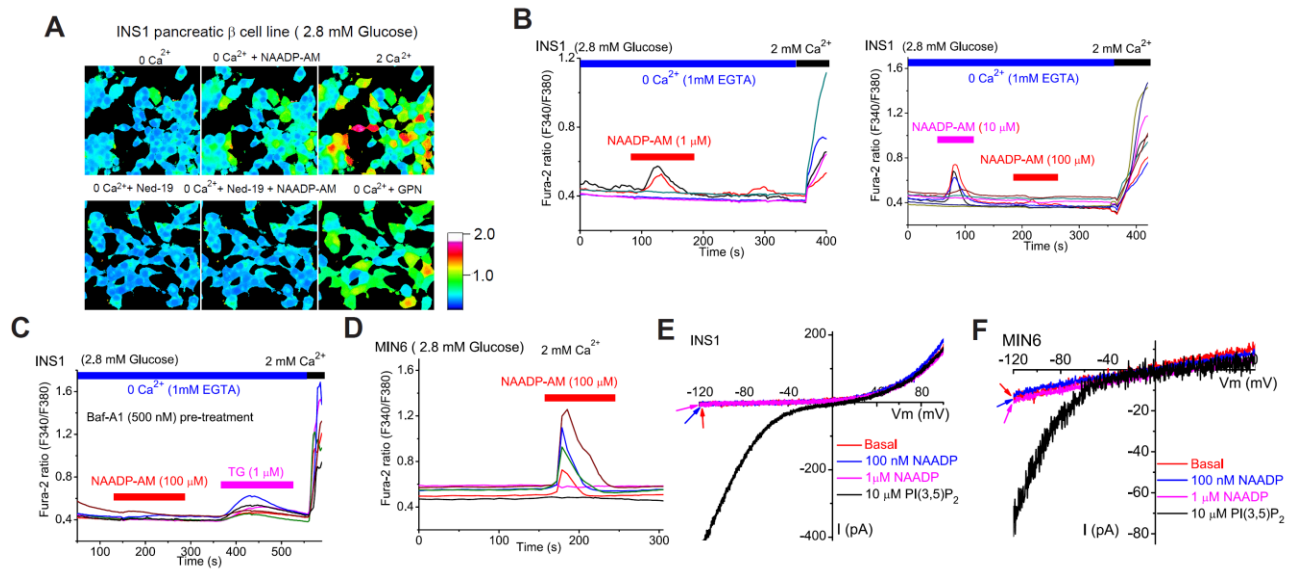

**Figure S7. Pancreatic  $\beta$ -cell lines exhibit NAADP-induced lysosomal  $\text{Ca}^{2+}$  release but lack TPC currents--Related to Figure 7.**

**(A).** In the absence of external  $\text{Ca}^{2+}$  (free  $[\text{Ca}^{2+}] < 10 \text{ nM}$ ), NAADP-AM ( $100 \mu\text{M}$ ) induced  $\text{Ca}^{2+}$  release measured with Fura-2 ( $F_{340}/F_{380}$ ) ratios from intracellular stores in INS1 cells. Ned-19 ( $50 \mu\text{M}$ ) abolished the majority of the response.

**(B).** NAADP-AM ( $1 \mu\text{M}$ ) induced small  $\text{Ca}^{2+}$  transients in a subset of INS1 cells in the absence of external  $\text{Ca}^{2+}$  ( $0 \text{ Ca}^{2+}$ ); NAADP-AM ( $10 \mu\text{M}$ ) induced and desensitized  $\text{Ca}^{2+}$  release in INS1 cells. After NAADP-AM ( $10 \mu\text{M}$ ) induced small  $\text{Ca}^{2+}$  transients in a subset of INS1 cells in the absence of external  $\text{Ca}^{2+}$  ( $0 \text{ Ca}^{2+}$ ), a higher concentration of NAADP-AM ( $100 \mu\text{M}$ ) failed to further induce  $\text{Ca}^{2+}$  responses in the same cells.

**(C).** Bafilomycin A1 pretreatment abolished NAADP-induced  $\text{Ca}^{2+}$  release in INS1 cells; thapsigargin (TG;  $1 \mu\text{M}$ ) induced  $\text{Ca}^{2+}$  responses in the same cells.

**(D).** NAADP-AM ( $100 \mu\text{M}$ ) induced small  $\text{Ca}^{2+}$  transients in MIN6 pancreatic  $\beta$ -cells.

**(E).** NAADP ( $100 \text{ nM}$  or  $1 \mu\text{M}$ ) failed to elicit whole-endolysosome current in INS1 cells. In contrast,  $\text{PI}(3,5)\text{P}_2$  activated TRPML-like currents (re-plotted from the *Suppl. Fig. S2G*) in the same vacuole. Note that the outward current present in this vacuole was insensitive to  $\text{PI}(3,5)\text{P}_2$ .

**(F).**  $\text{PI}(3,5)\text{P}_2$  activated predominantly TRPML-like inward currents in MIN6 cells. NAADP ( $100 \text{ nM}$  or  $1 \mu\text{M}$ ) failed to elicit any measurable whole-endolysosome current in MIN6 cells. In contrast,  $\text{PI}(3,5)\text{P}_2$  activated TRPML-like currents in the same vacuole.
